# Supplementary material for: Sustainable and Innovative Packaging Solutions in the Fashion Industry: Global Report
Source: MDPI journal article supplement (doi:10.3390/su142013476), 2022-10-19
Supplement: s1 [file s1]

Archive with 1 entries (1 files):
- sustainability-1969393-supplementary.pdf
