# Supplementary material for: Sustainable and Innovative Packaging Solutions in the Fashion Industry: Global Report
Source: MDPI journal article supplement (doi:10.3390/su142013476), 2022-10-19
Supplement: s1 [file s1 › sustainability-1969393-supplementary.pdf]

# **SUSTAINABLE & INNOVATIVE PACKAGING SOLUTIONS**

**IN THE FASHION  
INDUSTRY**

Global Report

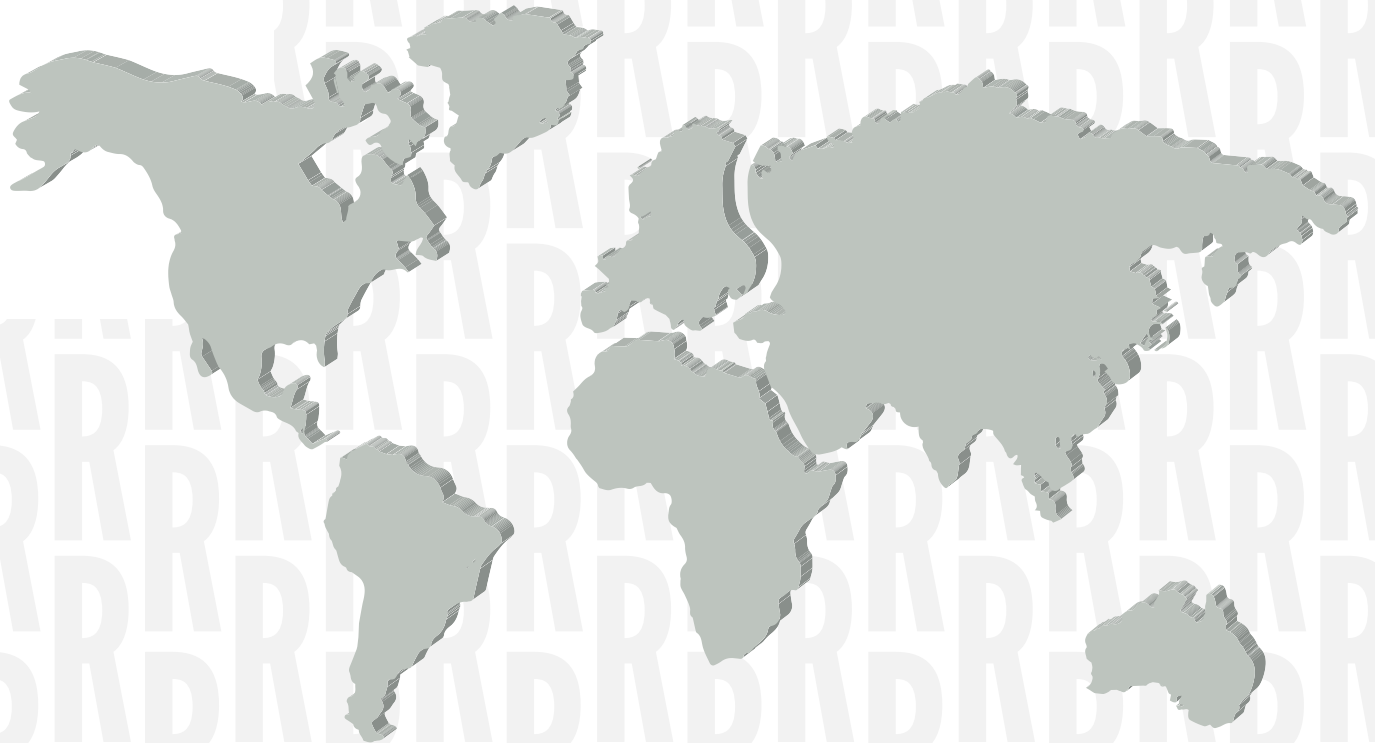

The fashion industry generates large amounts of packaging waste through the entire value chain. Although brands are making efforts to improve packaging sustainability as demands for low-impact packaging are rising, there is a lack of empirical evidence of innovative packaging solutions among fashion retailers.

This study represents the first global report on sustainable packaging innovation in the fashion sector. A data-mining approach was utilized to gather a sample of 400 international fashion brands that advertise sustainable packaging solutions across five continents. The sustainability of the packaging solution was evaluated for each brand based on three factors: sustainability mission, the availability of packaging data, and the actual sustainability of the package.

The results showed that 57% of brands have made evident progress in the sustainable packaging area; 34% of brands have initiated the transition from conventional to improved packaging; the remaining brands have committed to rethink (4%) or to improve (8%) their packaging in the future.

By providing comprehensive state-of-the-art evidence about the most recent practical achievements in the sustainable packaging field this global report intends to help academics, and practitioners evaluate the environmental, social, and economic impacts of existing packaging products and to design circular packaging that minimizes these impacts.

This section provides an overview of the data collected, dividing the brands alphabetically and according to the continents of origin. The brand name, the type of products, their target audience, the mission statement, and the kind of packaging are presented.

## CONTINENT

## BRAND

---

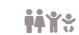

Type of products and who are they intended for: female, male, children, babies.

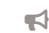

Mission statement and branding strategy show how and what the brand communicates to the public.

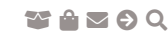

Type of packaging: boxes, bags, mailers, other, not explicitly defined.

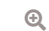

Extra data on packaging (if available).

AAKS  
HAND-CRAFTED

lemlem  
by liya kebede

PANAFRICA

(Sole)  
rebels

dorsu

TONGORO

YEVU

KIMKINI

MATTER

NÔ NASTIES

nomads

OHSEVENDAYS

northmist

PEOPLE TREE  
Truly Conscious Clothing

OZ  
BABY.FI

THE R COLLECTIVE

Reflect Studio

TOKYO BAGS

boxes bags mailers other  
not explicitly defined extra data

## AFRICA

### AAKS

- Accessories
- African weaving techniques, social impact, handmade, local economy, economic improvement, job creation, durability, craftsmanship, ethical, quality, authenticity, unique designs, bright colors
- Hand stitched Cotton Pouch

### lemlem

- Clothing
- Artisan garments, women empowerment, responsibly made, art, local weaving techniques, preserving local art, economic improvement, social impact
- Compostable Materials

### Panafrica

- Footwear
- Social impact, environmental impact, raw materials, equality, local farmers, traceability, natural dyes, women empowerment, women weavers, innovative, vertical integration
- Recyclable materials

### Solerebels

- Footwear
- Recycled materials, organic cotton, fair trade
- Reusable materials

## TONGORO

- Clothing
- Playful, unique designs, local tailors, social impact, artisan garments, economic improvement, sourced in Africa, Africa-based manufacturing
- Not specified

### YEVU Clothing

- All
- Social impact, inclusivity
- Plastic-free, compostable materials, eco-friendly materials
- Label, tissue paper, stickers, hard collateral

## ASIA

### Dorsu

- Clothing
- Environmental impact, consumer confidence, Cambodian
- Mesh fabric bags, Compostable materials, Recycled materials
- Swing Tags, Mailers

### Kimkini

- All except Jewelry and Footwear
- Sustainable swimwear, tailord swimwear, made just for you
- Compostable Materials
- Tissue Paper, Stickers

## MATTER

- Clothing
- Heritage prints, heritage styles, rural artisans
- Recycled material

### No Nasties

- Clothing
- Organic cotton, vegan, animal cruelty-free
- Organic, fair-trade vegan cotton, Plastic-free, Recycled materials
- Tags, tape

### Nomads

- Clothing
- Environmental impact, ethical, ethical trading
- Recyclable paper, biodegradable materials

### North Mist

- Clothing
- Environmental impact, conscious consumption
- Recycled paper, biodegradable materials, plastic-free, chemical-free
- Tags

### OhSevenDays

- All except Jewelry and Footwear
- Deadstock fabric, sustainable, slow fashion, ethical, understated, charismatic, functional,

compatible, compact collections  
Recyclable materials

### OzBaby

- Clothing
- Multiple owned brands
- Recycled materials, reusable materials

### People Tree

- All except Footwear
- Artisan garments, local weaving skills, local embroidery skills
- Recyclable and biodegradable polypropylene, recyclable paper

### Reflect Studio

- Accessories
- Sustainable products, functional
- Biodegradable plastic
- Hang tags, fabric cover bags, certified paper cover bags

### The R Collective

- Clothing
- Stylish
- Biodegradable materials
- Labels, hang tags

### Tokyo Bags

- Accessories
- Vegan, sustainable products, consumer confidence
- Recycled paper
- Soy based ink

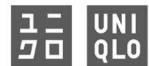

yasmina q

ALL THE  
Wild Roses

**Afends.**

A&H ATMOS&HERE

Bhumi

BONDI BORN

'BOODY'

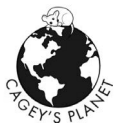

CARLIE BALLARD

DHARMABUMS

NEZILIO WOLF

duffle&co

elle evans  
MADE FOR YOU, AND THE PLANET.

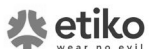

fabrik.  
CLOTHING WITH A CONSCIENCE

HUXBABY

FIRST BASE

isla  
in bloom

JACKFRUIT

boxes bags mailers other  
not explicitly defined extra data

## UNIQLO

- 👤 Clothing
- 🔊 Quality
- 🔍 Not specified
- 🔍 Paper envelopes

## Yasmina Q

- 👤 Clothing
- 🔊 Women empowerment, social impact, sustainable practices, environmentally-friendly
- 📦 Sugar cane, recycled paper
- 🔍 Hang tags, stickers

## AUSTRALIA

## Afends

- 👤 All except Jewelry and Footwear
- 🔊 Conscious consumption
- 📦 Corn Starn-Based
- 🔍 Recyclable Tags

## All the Wild Roses

- 👤 Clothing
- 🔊 Skilled workers, women empowerment, artisan garments
- ➡ Recycled Materials

## Atmos&Here

- 👤 All
- 🔊 Consumer confidence
- ➡ Packaging material not defined

## Bhumi

- 👤 Misc.
- 🔊 Environmental impact, conscious consumption, social impact
- ➡ Recycled Kraft paper
- 🔍 Recyclable Boxes

## Bondi Born

- 👤 Clothing
- 🔊 Women empowerment, environmental impact, social impact, quality
- 🔍 Compostable, Recyclable

## Boody

- 👤 All except Jewelry and Footwear
- 🔊 Environmental impact, environmentally-friendly materials, innovative
- 🔍 Recycled Paper
- 🔍 Vegetable Inks

## Cagey's Planet

- 👤 All except Jewelry and Footwear
- 🔊 Social responsibility, fair wages, working conditions, social impact, minimal production, local communities, slow fashion, quality, durable, transparency, ethical
- 📦 Composable materials
- 🔍 100% organic cotton tote bag

## Carlie Ballard

- 👤 All except Jewelry and

Footwear

- 🔊 Handmade, environmental impact, environmentally conscious, luxury
- 📦 Biodegradable Mailers

## Citizen Wolf

- 👤 Clothing
- 🔊 Slow fashion, environmental impact
- 📦 Compostable materials

## Dharma Bums

- 👤 Clothing
- 🔊 Environmental impact, consumer confidence
- 🔍 Biodegradable Materials
- 🔍 Swing Tags

## Duffle and Co

- 👤 Accessories
- 🔊 Artisan techniques, craftsmen, social impact, environmental impact, luxury
- 📦 Compostable materials

## Elle Evans

- 👤 Clothing
- 🔊 Environmental impact, recycled plastic, sustainable packaging, sustainable shipping
- 📦 HEROPACK/Compostable

## Etiko

- 👤 All except Jewelry
- 🔊 Human rights, ethical, child labor free, healthy work environment

- 📦 Compostable materials, Cardboard
- 🔍 Swing tags

## Fabrik

- 👤 Clothing
- 🔊 Ethical, sustainable products, slow fashion
- 📦 Recycled Fabric

## First Base

- 👤 All except Jewelry and Footwear
- 🔊 Ethical, sustainable products, working conditions, environmental impact
- 📦 Biodegradable Materials, Plant Based
- 🔍 Mailers

## Huxbaby

- 👤 Clothing
- 🔊 Environmental impact
- 📦 Biodegradable polybags
- 🔍 Mailers

## Isla in Bloom

- 👤 Clothing
- 🔊 Redefining classics, individual style, women empowerment
- 📦 Compostable Materials, Recycled Paper
- 🔍 Hang Tags

## Jackfruit the Label

- 👤 Underwear and Socks
- 🔊 Environmental impact, waste reduction, sustainably sourced,

JU  
DE

Kathmandu®

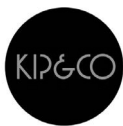

KITX

kowitz

Auguste

LITTLE EMPEROR  
SYDNEY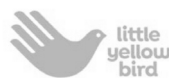

Maggie Marilyn

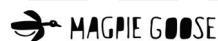

NATALIJA

Opia

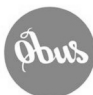

OUTLAND DENIM

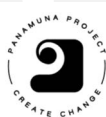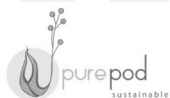

boxes bags mailers other  
not explicitly defined extra data

vegan, animal cruelty-free  
➔ Post-consumer recycled paper, Compostable Materials  
🔍 swing tags, packing slips, wrapping paper, Mailers

### Jude Store

👤 All except Footwear  
🔊 Handmade, slow fashion, quality clothing  
🔍 Packaging material not defined

### Kathmandu

👤 All except Jewelry  
🔊 Certified B-corp, sustainability focused  
🔍 FSC Certified Materials, Soy-Based Inks

### Kip&Co

👤 Clothing  
🔊 Environmental impact  
📦 Cotton Bags, Corn starch bags, Recycled Paper  
🔍 Product Inserts

### KITX

👤 All except Jewelry  
🔊 Quality, responsibly sourced, environmental impact, women empowerment, ethical, better world, beautiful  
🔍 Compostable Packaging

### Kowitz

👤 Clothing  
🔊 Slow production, slow

fashion, worker's rights, environmental protection, fair wages, no child labor, gender equality

➔ Recycled Materials, Petroleum-free  
Lé Buns  
👤 All except Jewelry and Footwear

🔊 Environmental impact, natural fibres, organic fibres, regenerated fibres, luxury  
📦 Biodegradable Materials

### Little Auguste, Auguste the Label

👤 Clothing  
🔊 Slow fashion  
📦 Biodegradable Materials, Plant Based

### Little Emperor

👤 Clothing  
🔊 Living wages, GOTS certified organic cotton, protect biodiversity  
🔍 Packaging material not defined

### Little Yellow Bird

👤 All except Jewelry and Footwear  
🔊 Ethical sourcing, ethical production, sustainable, fair trade  
📦 Paper based, Cardboard  
🔍 Boxes

### Maggie Marilyn

👤 All except Footwear

🔊 Transparency, circularity, regenerative, inclusivity, people empowerment, economic impact, social impact, environmental impact, conscious consumption, elegant, timeless, passionate, confidence  
➔ Carbon neutral, calcium carbonate, non-toxic recycled resin, zero water, no acid, recyclable plastic, recycled HDPE, certified cardboard, recycled card, sustainably managed forest materials, biodegradable plastics  
🔍 Biodegradable cassava polybags

### Magpie Goose

👤 Clothing  
🔊 Aboriginal artists, handmade  
📦 Compostable materials

### Natalija

👤 Clothing  
🔊 Ethical, social impact, environmental impact, comfortable, functional, simplicity, quality, beautiful, ease, versatility  
📦 Compostable materials  
🔍 Tissue paper

### Obus

👤 Clothing  
🔊 Natural fibres, social impact, local industry, local economy  
📦 Plastic-free, recyclable materials, reusable materials  
🔍 Hang tags

### Opia

👤 Clothing  
🔊 Plant-based clothing, simple designs, raw materials, slow fashion  
📦 Cassava, compostable materials

### Outland Denim

👤 Clothing  
🔊 Environmental impact, inclusivity, women empowerment, raw materials, water reduction, energy reduction, chemical reduction, Cambodian  
📦 Recyclable and compostable cardboard  
🔍 Thank you cards

### Panamuna Project

👤 Clothing  
🔊 Sustainable practices, simplicity, donations  
🔍 Biodegradable materials, plastic-free, recycled paper

### Pure Pod

👤 Clothing  
🔊 Organic materials, natural fibres, local artisan garments, hand loomed textiles, low toxic dyes, hand block printed, GOTS  
📦 Compostable materials  
🔍 Hang tags, recyclable/ recycled paper

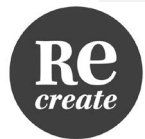

Salt Gypsy

SPELL

ST. AGNI

TUTU DU MONDE

team  
timbuktu.

YÖLI & OTIS

ACHIV

AIKYOU

4254  
FORTY TWO FIFTY FOUR

ALLY BEE

alfie douglas

A  
Woven  
Plane

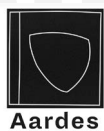

ABSOLUTELY  
BEAR

aialu

AK THREADS

afterglow

ADDNATURE

AGOGIC

boxes bags mailers other  
 not explicitly defined extra data

## Recreate

- Clothing
- Ethical, social impact, inclusivity, training, economic improvement
- Plant-based
- Recycled and reusable cotton bags, printed materials

## Salt Gypsy

- Clothing
- Durable products, ethical, regenerated nylon, sustainable practices
- Biodegradable materials

## SPELL

- All
- Female-owned, ethical, women empowerment
- Organic materials, reusable materials, compostable materials, plant-based
- Poly bags

## St. Agni

- Footwear
- Handmade, art, minimal production
- Recyclable materials, compostable materials

## Team Timbuktu

- Clothing
- Recycled plastic, oil-free
- Biodegradable materials, corn starch, recycled paper
- Garment bags, thank you cards

## Tutu du Monde

- Clothing and Footwear
- Simple designs, comfortable
- Compostable materials

## Yoli and Otis

- All
- Solution, newborn, baby
- Plastic-free, recycled materials

## EUROPE

42|54

- Clothing
- Sustainability, High-end fashion, functionality
- Repack - Reusable Packaging

## A Woven Plane

- Underwear and Socks
- Women empowerment
- Post consumer coffee cups & Virgin Fibers

## Aardes

- All except Footwear
- Slow fashion, skilled workers, environmental impact, social impact, traditions
- Recycled Cardboard
- recycled cardboard, water-based inks, recycled tissue paper, FSC certified paper stickers, biodegradable paper tape, garment swing tags from recycled cotton t-shirt cutoffs

## Absolutely the Bear

- Clothing
- Environmental impact, Improvement of Life
- Packaging material not defined

## Achiy

- Clothing
- Artisan garments, skilled workers, art, traditions, traditional production methods, indigenous people, handmade, minimal production, slow fashion
- Reusable packaging with RePack

## Addnature Sweden

- Misc.
- Outdoor life, Inspiration for outdoor activities
- Packaging material not defined

## Afterglow

- All except Jewelry and Footwear
- Sustainability, Earth-friendly, minimal environmental impact, functionality
- Repack packaging, recycled materials

## Agogic

- Clothing
- Quality clothing, Sustainable clothing, reduction of waste, slow fashion

- Repack packaging, recycled materials
- recycled polyester mini rope, recycled paper, envelope

## Aiayu

- All except Footwear
- Environmental impact, social impact
- non-virgin plastic from recycled plastic bottles

## Aikyou

- Underwear and Socks
- Women empowerment
- Recycled Cardboard

## AK Threads

- Clothing
- Slow fashion, conscious consumption, artisan garments, traditional practices, lifestyle, simple designs, simplicity, women empowerment, functional
- Muslin or Calico fabric

## Alfie Douglas

- Accessories
- Slow fashion, functional
- Cotton Canvas

## Ally Bee

- Clothing
- Conscious consumption, durable, sustainable products
- Packaging material not defined

**almasanta**  
SUSTAINABLE LUXURY FASHION

**alpa**

ANNA WALKER

**Arela**

**ARMANI**

**ARKET**

**A**

**art23**

A S K  
E T

**ASOS**

**avocadostore**

AWAY THAT DAY

*Ayten Gasson*

**BALLY**

**BAUKJEN**  
Designed for Good

*bella + frank*

**BS**  
BASERANGE

**BEEN**  
LONDON

**Bershka**

**BENEDETTI**  
eco luxury & animal free

📦 boxes 🛍️ bags ✉️ mailers ➡️ other  
🔍 not explicitly defined 🔍 extra data

## Almasanta

- 👤 Clothing
- 🔊 Luxury, sustainable products, trends
- ♻️ Recycled Materials

## Alpa

- 👤 Clothing
- 🔊 Quality clothing, responsible production
- 📦 Reusable and Recyclable

## Anna Walker London

- 👤 Accessories
- 🔊 Environmental impact, durable
- 📦 Cotton Dust Bags
- 🔍 cardboard boxes, padded paper envelopes, paper tape, tissue paper, paper stickers

## Arela

- 👤 All except Jewelry and Footwear
- 🔊 Sustainability, natural materials, durability, slow fashion, quality, cashmere knitwear, cotton basics, durable, functional, simplicity, minimalism, circularity, unique
- 📦 Repack packaging, recycled materials

## Arket

- 👤 All
- 🔊 Circularity, transparency, quality
- 📦 Paper Bags

## Armani

- 👤 All
- 🔊 Quality Materials, Luxury goods
- 🔍 Paper materials

## Armed Angels

- 👤 All
- 🔊 Work environment, quality, sustainable materials, slow fashion
- 🔍 Grass manufactured into paper

## Art23

- 👤 All except Jewelry and Footwear
- 🔊 GOTS certification, environmental focused
- 📦 Repack packaging, recycled materials

## Asket

- 👤 All except Jewelry and Footwear
- 🔊 Slow fashion, craftsmanship, environmental impact
- 📦 recycled cardboard and paper
- 🔍 recycled paper mailers

## ASOS

- 👤 All
- 🔊 Equality, consumer confidence
- 📦 Recycled Materials
- 🔍 Mailers

## Avocadostore

- 👤 All
- 🔊 Eco-fashion, sustainable natural fashion, recycled materials, biodegradable
- 🔍 Raw Materials
- ♻️ Recycled Materials

## Away That Day

- 👤 Clothing
- 🔊 Environmental impact, unique, stylish, functional
- 🔍 starched/compostable packaging

## Ayten Gasson

- 👤 Clothing
- 🔊 Ethical Manufacturing, quality, local suppliers, luxury, ethical, social impact
- 🔍 Biodegradable packaging

## Bally

- 👤 Misc.
- 🔊 Skilled workers, quality, durable, luxury, craftsmanship, leather
- 🔍 Packaging material not defined

## Base Range

- 👤 Clothing
- 🔊 Quality, environmental impact, innovative, natural fibres, recycled materials
- 🔍 Biodegradable packaging

## Baukjen

- 👤 All except Jewelry and Footwear
- 🔊 Slow fashion, local suppliers, carbon footprint reduction, slow fashion, economic improvement
- 🔍 Recyclable Paper

## BEEN London

- 👤 Accessories
- 🔊 Ethical, environmental impact
- 🔍 Recyclable Paper

## Bella+Frank

- 👤 Clothing
- 🔊 Environmental impact
- 🔍 Recycleable/Reusable/Compostable Plastic

## Benedetti

- 👤 Clothing
- 🔊 Sustainable, animal-free, luxury, craftsmanship, ethical business practices, organic, quality materials
- 🔍 Packaging material not defined

## Bershka

- 👤 All
- 🔊 Environmental impact, sustainable practices, social impact
- 📦 Recycled & biodegradable Paper
- 🔍 Recyclable Boxes
- ♻️ Recycled Bags

BIANCA&amp;NOE

BINGA  
BONGA  
organic fashion

BIRKENSTOCK

BJÖRN BORG

bleed

BOBO CHOSÉS

Boden

BONAVERI  
SARTORIAL  
Via Sabot 11 Comer  
ITALY

BOWER.

boohoo

BROTHERS  
WE STAND

BURBERRY

C&amp;A

Signe

CARIKI

CASA GIN

charl.  
knitwear

caur

CAWLEY

CHNGE

conscious

CLOSED

☑ boxes ☑ bags ☑ mailers ➡ other  
 🔍 not explicitly defined 🔍 extra data

## Bianca&Noe

- 👤 Clothing
- 🔊 Ethical, environmental impact, conscious consumption, social impact
- 🔍 Recyclable & biodegradable

## Bingabonga

- 👤 All except Jewelry and Footwear
- 🔊 sustainability, durable, increase the quality of life
- 🔍 Packaging material not defined

## Birkenstock

- 👤 Footwear
- 🔊 Heritage
- 🔍 Recycled packaging

## Bjorn Borg

- 👤 Misc.
- 🔊 Conscious consumption
- ☑ Cardboard Bags

## Bleed

- 👤 All except Jewelry
- 🔊 Lifestyle
- ☑ Recycled boxes

## Bobo Choses

- 👤 Underwear and Socks
- 🔊 Playful work environment, family values, local techniques, comfortabl
- 🔍 Recyclable & biodegradable

## Boden

- 👤 Clothing
- 🔊 Quality, durable, environmental impact, healthy work environment
- ☑ Recyclable materials

## Bonaveri

- 👤 Mannequins and bust forms
- 🔊 Environmental impact, waste reduction, environmentally-friendly materials, innovative, carbon emissions reduction, renewable materials, natural paints
- 🔍 Packaging material not defined

## Boohoo

- 👤 All
- 🔊 Fashionable clothing
- ☑ Recyclable materials

## Bower

- 👤 Clothing
- 🔊 Waste reduction, environmental impact, minimal production
- ➡ Cellulose fiber
- 🔍 Recycled fiber shipping boxes

## Brothers We Stand

- 👤 All
- 🔊 Sustainable products, Men's and Women's Empowerment
- 🔍 Recycled materials

## Burberry

- 👤 All
- 🔊 Creative nature, innovative, digital marketing initiatives, dynamic retail strategies
- 🔍 Recycled materials

## By Signe

- 👤 Clothing
- 🔊 Environmental impact, responsibly sourced
- ☑ Recycled materials
- 🔍 biodegradable bags

## C&A

- 👤 All except Jewelry and Footwear
- 🔊 Quality, sustainable products
- ☑ Recycled materials

## Cariki

- 👤 Clothing
- 🔊 Sustainable products
- ☑ Biodegradable Mailers

## CasaGIN

- 👤 Clothing
- 🔊 Plastic-free, responsible manufacturing, environmentally conscious, environmental impact
- ☑ Corn starch Biodegradable

## Caur

- 👤 Clothing
- 🔊 Environmentally responsible, ethical, circularity,

- environmental impact, inclusivity
- 🔍 Recyclable compostable

## Cawley

- 👤 Clothing
- 🔊 Quality, craftsmanship, durable, functional
- ☑ Packaging material not defined

## Charl Knitwear

- 👤 Clothing
- 🔊 Slow fashion, quality, durable
- ➡ Recycled Plastic Bottles

## CHNGE

- 👤 Clothing
- 🔊 Fair trade, carbon-neutral, sustainable fabrics
- 🔍 Recycled Paper

## Closed

- 👤 Clothing
- 🔊 Craftsmanship, quality, heritage, family business, traditions, innovative, denim
- ☑ Recycled Materials

## Conscious the Label

- 👤 Clothing
- 🔊 Recycled fabrics, simple designs, recycled plastic, environmental impact
- ☑ Recycled Materials
- 🔍 Paper Tape, Cotton rope

corkor

cotton &amp; push.

Deakin  
& Blue

ECOALF

Eisdieler

ekn

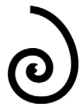el<sup>ly</sup>la  
ethical accessories

ELVIS &amp; KRESSE

eticl<sup>ó</sup>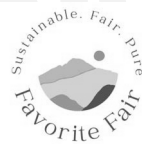

EVARAE

Filippa K

finisterre

FOR THE creators

FRANCIS STORIES.

FRENN  
HELSINKI

G-STAR RAW

Gurly  
tree

GANNI

go as u.r

boxes bags mailers other  
 not explicitly defined extra data

## Corkor

- Accessories
- Vegan, competitive pricing, customer service
- Kraft paper

## Cotton &amp; Push

- Underwear and Socks
- Ethical, environmental impact, handmade, pure materials, social impact, local manufacturers, organic cotton farmers
- Plastic-free

## Deakin &amp; Blue

- Clothing
- Trends, sustainable products
- Recycled Materials
- Tissue paper

## Ecoalf

- All except Jewelry
- Quality, sustainable products
- Recycled Paper

## Eisdieler

- All except Jewelry
- Quality
- Packaging material not defined

## Ekn Footwear

- Footwear
- Portuguese craftsmen, organic materials, quality suppliers, environmental impact,

slow fashion, detail-oriented, no toxic chemicals  
 Packaging material not defined

## Elephant Cross

- Accessories
- Natural high quality fibers, environmental impact, fair working conditions
- Biodegradable Materials

## Ellyla

- Accessories
- Ethical, sustainable products, environmental impact, trends
- Recycled Materials

## Elvis &amp; Kresse

- Accessories
- Donations
- Rescued Nylon, Tea Sacks, Recycled Cardboard

Eticl<sup>ó</sup>

- All except Jewelry and Footwear
- Sustainable products, sophisticated, ethical, durable, sustainable materials
- Recycled Paper

## Evarae

- Clothing
- Conscious consumption, style, sustainable products, consumer confidence, women empowerment

- Kraft mailer, Recycled Materials
- Tissue Paper

## Favorite Fair

- All except Jewelry and Footwear
- Sustainable materials, vegan materials, fair fashion
- Reusable Materials

## Filippa K

- All except Jewelry and Footwear
- Conscious consumption, slow fashion, sustainable products, quality, responsibly sourced, ethical, style, durable
- Packaging material not defined

## Finisterre

- Clothing
- Ocean conservation, sustainable products, environmental impact, slow fashion, durable
- Biodegradable Materials, Kraft Pulp, Paper
- Mailers, Hangtags

## For the Creators

- Clothing
- Women empowerment
- Reusable Materials

## Francis Stories

- Clothing

- Slow fashion, quality, Natural Materials
- Packaging material not defined

## Frenn

- All except Jewelry and Footwear
- Quality, attention to details, comfort
- Reusable Materials
- Paper Bags

## G-Star

- All except Jewelry
- Luxury, denim, craftsmanship, untreated denim
- Packaging material not defined

## Ganni

- All
- Women empowerment
- Reusable Materials

## Gnarly Tree

- Clothing
- environmental impact, conscious consumption
- Recycled Materials

## Go as U.R.

- Clothing
- Diversity, women empowerment, trend-driven
- Recycled Paper
- Hangtags

graylabel

heiko  
CLOTHING

HONEST BASICS

H&amp;M

IRON ROOTS

J LABEL  
CONSCIOUS AND FAIRJack  
Wolfskin

Juno Jack's

Kings Of Indigo.

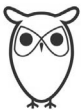KUYICHI  
PURE GOODS

haikure

hnst

HOPAAL

HURR

ID I O M A

\* SEE THE WORLD \*  
\* SPEAK THE LANGUAGE \*

TM UK. EST 2011

JAN | N JUNE

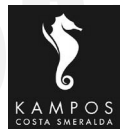

Klättermusen

L'ENVERS

boxes bags mailers other  
not explicitly defined extra data

## Gray Label

- All except Jewelry
- Slow fashion, organic cotton
- Recycled Materials

## H&amp;M

- All
- Sustainable, personal style
- Recycled Plastic

## Haikure

- Clothing
- Minimalistic, slow fashion, raw/organic materials
- Packaging material not defined

## Heiko Clothing

- Clothing
- Environmentally-friendly, environmental impact, independent designers, affordable, conscious consumption
- Packaging material not defined

## HNST

- Clothing
- Social impact, environmental impact, quality
- Packaging material not defined

## Honest Basics

- Clothing
- Accessibility, fair fashion
- Recycled Plastic

## Hopaal

- All except Jewerely and Footwear
- Plastic free, environmental impact, attention to detail, creativity
- Recycled Cardboard, Reusable Materials

## House of Dharma

- Clothing
- Slow fashion, investment pieces
- Recycled Materials

## HURR Collective

- All
- Women empowerment, sharing economy
- Reusable Materials

## Idioma

- Clothing
- Ethical, multiculturalism
- Organic Bidegradable Materials

## Iron Roots

- Clothing
- Design, Functionality, sustainability
- Packaging material not defined

## J Label

- Clothing
- Ethical production, organic, sustainable materials,

- fair working conditions, waste reduction, worker empowerment
- Recycled Cardboard, Recycled Plastic

## Jack Wolfskin

- All except Jewelry
- Trend-driven,
- Paper materials

## Jan'n June

- All except Footwear
- Affordable, sustainable fashion
- Recyclable Materials
- Wrapping paper, printer, paper, flyers, mailers

## Juno Jack's

- Clothing
- Women empowerment, breastfeeding
- Recycled Materials

## Kampos

- Clothing
- Luxury, recyclable materials, quality pieces, protecting marine life, organic fibers, recycled plastic bottles
- Recycled Materials, Plastic Free

## Kings of Indigo

- All except Jewerely and Footwear
- Quality, environmental impact, sustainability, social

- impact
- Packaging material not defined

## Klättermusen

- All except Jewerely and Footwear
- Utility, durability, enviroment-conscious, sustainable equipment
- Packaging material not defined

## Knowledge Cotton Apparel

- Clothing
- Sustainable, innovative, new tomorrow
- Packaging material not defined

## Kool and Konscious

- All except Footwear
- Sustainable and ethical fashion platform
- Packaging material not defined
- Recycled charms, organic cotton in their clothes

## Kuyichi

- Clothing
- Organic materials, recycled materials, worker's rights, equal pay, enviromental conscious
- Recycled Plastic

## L'ENVERS

- Clothing
- Slow fashion, quality,

la  
fille  
d'o

LAB ANTE™  
LONDON

LATER...  
IT'S ABOUT TIME

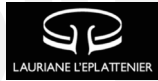

LEMOCEAN

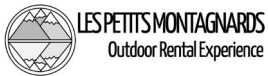

LINENFOX

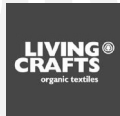

LITTLE GREEN RADICALS

LOST SHAPES

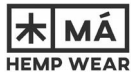

lowie

MADS  
NØRGAARD  
COPENHAGEN

made obvious

MAKIA  
EST. 2001 — HELSINKI

MANDALA  
YOGI UP YOUR LIFE

MANITOBER

mantis  
world

MARAZUL

📦 boxes 🛍️ bags ✉️ mailers ➡️ other  
🔍 not explicitly defined 🔍 extra data

environmental impact  
➡️ Cotton Packaging, Paper

### La Fille D'O

- 👤 Underwear and Socks
- 🔊 Women empowerment
- 🛍️ Fabric Material

### LaBante

- 👤 Accessories
- 🔊 Vegan, beautiful, consumer confidence
- 📦 Packaging material not defined

### Later

- 👤 Clothing
- 🔊 Environmental impact, recycled materials, slow fashion, fair wages, responsible consumption
- 📦 Reusable Materials

### Lauriane L'eplattenier

- 👤 All except Jewerely and Footwear
- 🔊 Slow fashion, ethical fashion, responsible consumption
- 📦 Reusable Materials

### Lemocean

- 👤 All except Jewerely and Footwear
- 🔊 Fair trade, sustainable, stylish, functionality
- 🔍 Packaging material not defined

### Les Petits Montagnards

- 👤 Accessories
- 🔊 Quality products, rental services, outdoor activities
- 🔍 Packaging material not defined

### LinenFox

- 👤 Clothing
- 🔊 Waste Reduction, Environmental Impact
- 📦 Packaging material not defined

### Little Green Rascals

- 👤 Clothing
- 🔊 Ethical fashion
- 🛍️ Biodegradable Materials, Corn-starch based, Recycled Paper, Organic Cotton
- 🔍 Postage Bags, Tissue Paper, Gift Ribbons

### Living Crafts

- 👤 All except Jewerely and Footwear
- 🔊 Enviromentally-friendly, sustainable, transparency
- 🛍️ Recyclable Materials, Recycled Cardboard
- 🔍 Sock Sleeves

### Lost Shapes

- 👤 Clothing
- 🔊 Ethical, organic cotton, sustainable, recycled fibers
- ➡️ Recyclable Materials

### Lowie

- 👤 Clothing
- 🔊 Sustainable, Quality, funtional
- 🛍️ Recycled Paper, Plastic Bags

### MÁ Hemp Wear

- 👤 Clothing
- 🔊 Sustainable hemp, quality
- 🛍️ Grass Paper

### Made Obvious

- 👤 Clothing
- 🔊 Ethical, handmade, minimal production
- 📦 Recycled Materials, Water-based ink

### Made&More

- 👤 All except Jewelry
- 🔊 Transparency, sustainable materials, natural materials, sustainable practices
- 📦 Reusable Materials

### Mads Nørgaard

- 👤 Clothing
- 🔊 Slow fashion
- 📦 Recycled materials

### Makia

- 👤 All except Jewerely and Footwear
- 🔊 Durable
- 📦 Recycled materials, reusable materials

### Mandala

- 👤 Clothing
- 🔊 Social impact, natural materials, recycled materials, responsibly sourced, transparency, supply chain standards, innovative, sustainable practices, fair wages, healthy work environment
- 📦 Recycled cardboard, certified paper
- 🔍 Tissue paper

### Manitober

- 👤 Clothing
- 🔊 Gender neutral, sustainable materials, social impact, ethical, durable, product warranty, refurbished products, product repair
- 📦 Recycled materials

### Mantis World

- 👤 All except Jewerely and Footwear
- 🔊 Quality, sustainable practices, well-made, social impact, supply chain standards, environmental impact
- 📦 Plastic and cardboard
- 🔍 Polybags

### Marazul

- 👤 Clothing
- 🔊 Consumer confidence, social impact, environmental impact, ethical, natural dyes, responsibly sourced
- 📦 Recycled materials

M&S  
EST. 1884

M A S A I  
COPENHAGEN

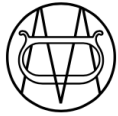

Mayamiko

mini rodini

mila.vert

MINUIT  
SUR TERRE

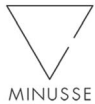

MINUSSE

MITRA  
THE LABEL

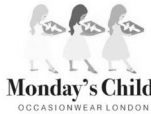

Monday's Child  
OCCASIONWEAR LONDON

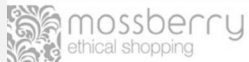

mossberry  
ethical shopping

MOTHER OF PEARL

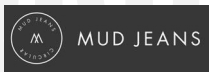

MUD JEANS

nat-2

Nanushka

needle & thread

NEU NOMADS

navy grey

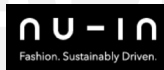

Fashion. Sustainably Driven.

boxes bags mailers other  
not explicitly defined extra data

## Marks & Spencer

All

- Quality, innovative
- Recycled plastic

## Masai

Clothing

- Inclusivity, body positivity, women empowerment
- Paper and recycled fiber

## Massimo Dutti

Clothing

- Quality, comfortable
- Recycled cardboard

## Mayamiko

Clothing

- Indigenous artisans garments, traditional African techniques, locally sourced fabrics
- Recyclable and compostable materials
- Stickers, labels, and tissue paper, Eco inks

## Mila.Vert

Clothing

- Ethical, stylish
- Plastic-free, biodegradable paper, cardboard
- Fabric bags

## Mini Rodini

All except Jewerely and Footwear

Environmental impact, social impact

- Recycled materials and biodegradable materials

## Minuit Sur Terre

Misc.

- Vegan, animal cruelty-free, quality, environmental impact
- Plastic-free, recycled cardboard, certified paper film
- Muslin paper, shipping labels, padding paper

## Minusse

Clothing

- Environmental impact, conscious consumption
- Recycled materials, reusable materials

## Mitra the Label

Clothing

- Environmental impact, environmentally-friendly, conscious consumption
- Recycled materials, biodegradable materials

## Monday's Child

All except Jewelry

- Natural fabrics, slow fashion, quality, durable
- Recycled cardboard

## Mossberry Clothing

Clothing

- Environmental impact,

ethical

- Recycled, recyclable, or biodegradable materials

## Mother of Pearl

All except Jewelry

- Luxury, consumer confidence
- Plant-based materials, recycled materials

## MUD Jeans

Clothing

- Circularity, organic cotton, recycled cotton, simplicity
- Plastic-free, recycled cardboard, organic cardboard, recyclable cardboard, biodegradable cardboard

## Nanushka

All

- Environmental impact, craftsmanship, modern, creativity, responsible production, traditional culture, contemporary culture, innovative, heritage, conscious consumption, hand technique, functional, beautiful, community, nature, low-impact credentials, pure design,
- Compostable materials, recycled paper, recyclable paper, reusable materials
- Compostable filling chips, compostable polybags, brand and size labels, hang tags, thank you cards

## Nat-2

Footwear

- Disruptive materials, innovative
- Recycled paper
- Flyers

## Navygrey

Clothing

- Ethical, transparency, traceability, wool, raw materials, slow fashion
- Recycled materials, reusable materials

## Needle and Thread

All except Jewerely and Footwear

- Quality, beautiful
- Certified raw materials, recycled materials, reusable materials Biodegradable poly bags

## Neu Nomads

Clothing

- Above living wage, healthy work environment, social impact, women empowerment, family-owned factory, healthcare benefits
- Recycled, biodegradable materials, paper

## Nu-in

Clothing

- Environmental impact, recycled materials, organic

nudge

Nudie Jeans co

O MY BAG  
AMSTERDAM

oftt

ONLOAN

organicbasics

organic people.

ORIGIN X  
PERFORMANCE

otto group

OYSHO

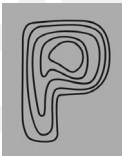

PANGAIA

Paul Smith

PHOEBE ENGLISH

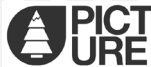

PINK BOUTIQUE

PLANET WARRIOR

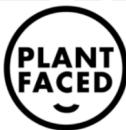PLASTIC  
FREEDOM

boxes bags mailers other  
not explicitly defined extra data

materials, water reduction  
Recycled fibers, virgin fibers,  
certified cardboard  
Paper liner

### Nudge

All except Jewelry and Footwear  
Ethical, quality, natural materials  
Recycled materials, reusable materials

### Nudie Jeans

Clothing  
Dry denim, untreated fabrics, raw fabrics  
Recycled plastic, new plastic

### O My Bag

Accessories  
Environmental impact, ethical  
Recycled materials, reusable materials

### Oftt

Clothing  
Slow fashion, quality  
Organic materials, recycled materials, certified paper, plastic-free, compostable materials

### OnLoan

All except Footwear  
Reduce waste, independent designers

Recycled materials, reusable materials

### Organic Basics

All except Jewelry and Footwear  
Environmental impact, sustainable fabrics, supply chain standards, sustainable practices  
Plastic-free, recycled paper

### Organic People

Clothing  
Environmental impact, transparent pricing, ethical, organic materials, vegan  
Recycled materials, reusable materials

### Origin x Performance

All except Jewelry and Footwear  
Vegan, animal cruelty-free, biodegradable, compostable, sustainable fabrics, sustainable materials, slow fashion, sustainable practices, supply chain standards  
Biodegradable materials, compostable materials  
Postage labels, hang tags

### Otto Group

All  
Social impact, multichannel retail, multiple owned brands, environmental impact  
Recycled materials, reusable materials

### Oysho

All except Jewelry  
Women empowerment  
Recycled paper, certified paper, recyclable cardboard

### Pangaia

Clothing  
Low environmental impact, bio-engineered materials, smart technology, recyclable materials  
Not specified  
Biodegradable TIPA garment bag

### Parkdresen

Clothing  
Rental clothing  
Recycled materials, reusable materials

### Paul Smith

All  
Organic cotton, recycled plastic bottles, recycled polyester, byproduct leather, byproduct down  
Recyclable materials, biodegradable materials, compostable materials  
Biodegradable protective sleeves

### Phoebe English

Clothing  
Not mass-made, minimal production, slow fashion, quality, Biodegradable materials,

compostable materials, recyclable materials, plastic-free  
Tissue paper, tape, protective paper bag

### Picture Organic

All except Jewelry  
Environmentally friendly design, quality, unique designs  
Recycled materials, reusable materials

### Pink Boutique

Clothing  
Competitive prices  
Sugarcane, biopolymer

### Planet Warrior

Clothing  
Recycled plastic, eco-rubber  
Recyclable cardboard  
Tissue paper, tape

### Plant Faced

Clothing  
Ethical, vegan, fair-trade, animal cruelty-free  
Recycled paper, water-based inks  
Woven labels

### Plastic Freedom

Clothing  
Plastic free, environmental impact, social media  
Not specified  
Tissue paper, tape

PME STORE

PO & ZU  
SHOES WITH A GOOD SOLEP&B  
PULL & BEAR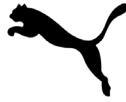

pure bundle

Pure Waste

QNOOP

RAPANUI

RÆBURN

recreation.

redfeet brothers

ROCKAY

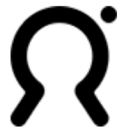RRREVOLVE  
Fair Fashion & Eco Design

SAMSØE SAMSØE

SAINT + SOFIA

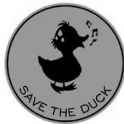

boxes bags mailers other  
not explicitly defined extra data

## PME Store

- 👤 All except Jewerely and Footwear
- 👉 Recycled polyester in clothes (brand PME Legend)
- 📦 Recycled materials, reusable materials
- 🔍 Re:Pack packaging solution

## Po Zu

- 👤 Footwear
- 👉 Ethical
- 🔍 Biodegradable plastic, recycled cardboard

## Pull&Bear

- 👤 Clothing
- 👉 Reduce waste, recycled packaging, reduce GHG emissions, reusable and recyclable products, zero waste goal
- 🔍 Certified paper, sustainably managed forest paper, recycled paper, recyclable paper, recycled plastic, recycled materials

## Puma

- 👤 All
- 👉 Consumer confidence, empowerment, sport, athletes
- 📦 Certified paper, recycled paper, recycled cardboard

## Pure Bundle

- 👤 Clothing
- 👉 Sustainable practices, stylish, simplicity, preloved, curated

- 📦 Recycled materials, reusable materials

## Pure Waste

- 👤👤👤 Clothing
- 👉 Recycled cotton, recycled plastic bottles, durable, slow fashion
- 📦 Recycled materials, reusable materials

## Qnoop

- 👤👤👤 Underwear and Socks
- 👉 Organic cotton, organic materials, recycled materials, ethical, vegan, quality, innovative, Global Organic Textile Standard, sustainable practices
- 🔍 Biodegradable materials, recycled cardboard
- 🔍 Hang tags

## RÆBURN

- 👤 Clothing
- 👉 Material scraps
- 📦 Recyclable materials, biodegradable materials, recycled materials, corn starch
- 🔍 Outer protective sleeve

## Rapanui

- 👤 All except Jewerely and Footwear
- 👉 Social impact
- 🔍 Paper, cardboard
- 🔍 Tape

## Recreation

- 👤 All except Jewerely and Footwear
- 👉 Transparency, durable products, environmental impact, social impact, responsibly sourced
- 📦 Recycled materials, reusable materials

## Redfeet Brother

- 👤 Clothing
- 👉 Reduce carbon footprint, environmental impact, water reduction
- 📦 Recycled materials, reusable materials

## Rifo

- 👤 All except Jewerely and Footwear
- 👉 Recycled materials
- 📦 Recycled materials, reusable materials

## Rockay

- 👤 All except Jewerely and Footwear
- 👉 Recycled materials, recycled plastic, environmental impact
- 📦 Recycled paper, recycled cardboard
- 🔍 Biodegradable poly bags

## Rozenbroek

- 👤 All except Jewerely and Footwear
- 👉 Durability, environmental

- impact, ethical, solar-powered factory, handmade, solar power, sustainable practices
- 🔍 Recycled and recyclable cardboard, compostable materials

## RRRevolve

- 👤 All
- 👉 Organic cotton, tencel, lyocell, fair trade, sustainable materials
- 📦 Recycled materials, reusable materials

## Saint&Sofia

- 👤 All except Jewerly
- 👉 Art, production
- 🔍 Biodegradable and recycled materials

## Samsøe Samsøe

- 👤 All except Jewerly
- 👉 Environmental impact, deadstock fabric, repurposed clothing, recycled fabrics
- 📦 Sustainably managed forest paper

## Save the Duck

- 👤 All except Jewerly
- 👉 Animal cruelty-free, trends, cutting-edge
- 🔍 Biodegradable materials, compostable materials, certified paper, certified cardboard, recycled cardboard, recycled paper, recycled plastic

SAYE

SEASALT  
CORNWALLScandinavian  
Outdoor

seventy + mochi

Sézane

SKFK

som / skat

STAY WILD

STELLA McCARTNEY

Story mfg.

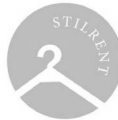STUDIO  
PIA

Stradivarius

SUPERGOODS  
eco + fair fashionTENDAM  
GLOBAL FASHION RETAIL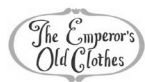SHIRT  
B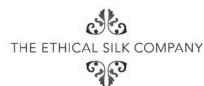

boxes bags mailers other  
not explicitly defined extra data

## Saye

- Footwear
- Natural yarns, no toxic chemicals, social impact, plant trees for purchases
- Biodegradable materials, corn starch, certified paper, certified cardboard, recycled cardboard, recycled paper

## Scandinavian Outdoor

- All except Jewelry
- Innovative, traditions, heritage, passion, social impact, environmental impact
- Recycled materials, reusable materials

## Seasalt

- All
- Durable products, organic fibres, recycled fibres, reduce carbon footprint, environmental impact, quality, sustainable practices
- Plastic-free, recyclable materials
- Labels

## Seventy + Mochi

- All except Jewerely and Footwear
- Women empowerment, social impact, craftsmanship
- Dead-stock denim, plastic-free

## Sézane

- All
- Social impact
- Sustainably managed forest paper, recycled materials, recyclable materials, certified fibres

## Skfk

- All
- Slow fashion, women empowerment
- Reusable materials, recycled paper, cardboard

## Somskat

- Clothing
- Sustainable products
- Recycled plastics

## Staywild

- Clothing
- Social impact, product purpose, environmental impact
- Recycled materials, recyclable materials
- Hang tags, hygiene liners

## Stella McCartney

- All
- Responsible, honest, ethical, sustainability
- Certified paper, recycled materials

## Stilrent

- Accessories
- Ethical, environmental impact, rental
- Recycled materials, reusable materials
- Return label

## Story mfg.

- Clothing
- Ethical, sustainability, style, conscious consumption, authenticity, dyers, weavers, embroiderers, tailors
- Biodegradable paper, recycled paper
- Hang tags

## Stradivarius

- Clothing
- Eco-friendly materials, GHG emissions reduction
- Recycled materials

## Studio Pia

- Underwear and Socks
- Luxury, quality, animal cruelty-free, organic silk, ethical
- Recyclable cardboard
- Tissue paper, cotton dust bag, gift box

## Supergoods

- All
- Sustainable practices, environmental impact, social impact, sustainable materials

- Recycled materials
- Return label

## Tendam

- All
- Lifestyle, bohemian style, sustainable materials, organic materials, recycled fabrics, environmental impact, slow fashions
- Cardboard

## The Bshirt

- Clothing
- Responsibly sourced, organic cotton, non-toxic dyes, environmental impact, no chemicals, no pesticides
- Recycled paper, plastic-free
- Garment bags

## The Emperor's Old Clothes

- Clothing
- Handmade, unique, limited edition fabrics, vintage fabrics
- Recycled materials, reusable materials

## The Ethical Silk

- Clothing
- Non-toxic dyes, fair trade, water recycling, luxurious silk, eco-friendly silk production, recyclable shipping mailers
- Recycled materials, recyclable materials
- Tissue paper, compostable clear eco bag

THE EXTRA SMILE  
..... wear to fair .....

THE NATURAL  
EDITION

THREE GRACES  
LONDON

TRALALA

trendspant.

UNBORN

UNDERPROTECTION  
ETHICS & AESTHETICS

unown

VARUSTELEKA.COM  
MILITARY AND OUTDOORS SPECIALISTS

VICTORIA BECKHAM

VILDNIS

vildare

Vivienne  
Westwood

WAES

WARSAW SAINTS

WAWA

WE  
ARE  
NATIV

VAUDE

WEEKENDBEE  
Sustainable sportswear

boxes bags mailers other  
not explicitly defined extra data

## The Extra Smile

- 👤 Clothing
- 👤 Female-owned, slow fashion, reduce waste, luxury, organic materials
- 🔄 Compostable materials, recycled materials, reusable materials

## The Natural Edition

- 👤 Clothing
- 👤 Simplicity, lifestyle, environmental impact, women empowerment, durable products, organic cotton, positive impact,
- 📦 Plastic-free, recyclable paper

## Three Graces

- 👤 Clothing
- 👤 Luxury, stylish, consumer confidence
- 🔍 Not specified

## Tralala Club

- 👤 All
- 👤 Independent designers, creativity
- 📦 Recycled materials, reusable materials

## Trendspant

- 👤 Clothing
- 👤 Quality, sustainable practices, streetwear, surfwear
- 📦 Recycled materials, reusable materials

## UNBORN

- 👤 Clothing
- 👤 Waste reduction, environmental impact, slow fashion, well-made, durable, craftsmanship
- 📦 Recycled materials

## Underprotection

- 👤 All
- 👤 Ethical, recycled polyester, organic cotton, sustainable materials, tencel, lyocell, recycled nylon, recycled wool, banana fibers, vegan, reusable, waste resources
- 🔄 Biodegradable materials, recycled plastic, recycled paper, certified materials
- 🔍 Paper, wrapping, carton

## unown

- 👤 All except Footwear
- 👤 Sustainable practices, recyclable, environmental impact
- 📦 Reusable materials, recycled materials

## Varusteleka

- 👤 All
- 👤 Experience, knowledge, good in the world
- 📦 Recycled materials, reusable materials

## Vaude

👤👤👤 All

- 👤 Sustainable products, environmental impact
- 🔍 Eco-friendly cardboard, plastic
- 🔍 Plastic bags

## Victoria Beckham

- 👤 All
- 👤 Luxury, lifestyle, ready-to-wear
- 📦 Recycled kraft paper, recyclable material
- 🔍 Tissue paper

## Vildare

- 👤 Accessories
- 👤 Organic materials, animal cruelty-free, waste reduction
- 📦 Recycled materials, reusable materials
- 🔍 Biodegradable seed hang tag

## Vildnis

- 👤 Clothing
- 👤 Ethical, durable, environmentally-friendly
- 📦 Recycled polyethylene
- 🔍 Hang tags, tissue paper, paper stickers, returns form

## Vivienne Westwood

- 👤 All
- 👤 Innovative, art, social impact, environmental impact, human rights, climate change
- 🔍 Certified card and paper, recycled pulp, leather by-product, plastic-free
- 🔍 Shredded card

## Waes

- 👤 Footwear
- 👤 Environmental impact, stylish, environmentally-friendly
- 🔍 No-waste

## Warsaw Saints

- 👤 Clothing
- 👤 Innovative, small brand
- 📦 Plastic-free, recycled paper, water-based ink

## Wawwa

- 👤 All
- 👤 Recycled materials, organic materials, donations
- 📦 Plastic-free, plant-based, compostable materials

## We Are Thought

- 👤 Clothing
- 👤 Sustainable fabrics, organic fabrics, simple designs
- 📦 Compostable cornstarch
- 🔍 Labels

## WeAreNative

- 👤 Clothing
- 👤 Luxury, dynamic designs, recycled fabrics
- 📦 Compostable materials
- 🔍 Hang tags, eco-friendly stickers, packing paper

## Weekendbee

- 👤 All
- 👤 Multiple owned brands,

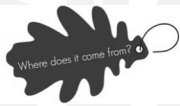

Will's Vegan Store  
LONDON  
Est. 2012

wyatt&jack

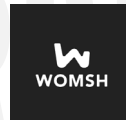

zalando

ZARA

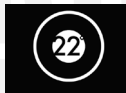

A DAY

AERA

ABLE  
LOCAL + GLOBAL

AHNIKO

AURA7  
AURORA7

ALIYA WANER

AMOUR VERT

allbirds

ARIELLE

ALTERNATIVE

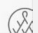

Azura Bay

boxes bags mailers other  
not explicitly defined extra data

environmental impact

Recycled materials, reusable materials

Packing slip, return label

### Where does it come from

All

Social impact, traceability, environmental impact

Recycled cardboard, recyclable materials

Tissue paper

### Will's Vegan Store

All

Vegan, slow fashion

Non-treated paper, non-treated cardboard, biodegradable materials

Water-based adhesive, backing paper, paper parcel tape

### Womsh

Footwear

Social impact, environmental impact

Recycled cardboard

Tissue paper

### Wyatt and Jack

Accessories

Recycled materials, living wage, social

Plastic-free, recycled, recyclable, and biodegradable materials

### Zalando

All

Innovative, reimagining fashion, empowering corporate culture

Post-consumer recycled materials, recycled cardboard

Makeup bags, polybags

### ZARA

All

Fast fashion, sustainability

Recycled cardboard, certified cardboard

Plastic bags

### NORTH AMERICA

### 22 Degrees

All

Environmental impact, quality, social impact, ocean environment

Packaging material not defined

Mailers

### ABLE

All

Economic improvement, quality, education, women empowerment, social impact, ethical

Cloth dust bags, Recycled Plastic, Repurposed Leather

### Aday

Clothing

Slow Fashion, Conscious Consumption

Biodegradable

### AERA

Footwear

Environmental impact, improvement of life, skilled workers, luxury, social impact, vegan, artisan garments

Post Consumer Waste, Organic Waster, Paper

### Ahniko

Clothing

Ethical, responsibly sourced, sustainable practices, social impact

PET Plastic

### Aliya Wanek

Clothing

Slow Fashion, sustainable fibres, ethical, handmade

Packaging material not defined

### Allbirds

Misc.

Simple designs, comfortable, natural materials

Recycled Cardboard

### Alternative Apparel

Clothing

Environmentally-friendly materials, environmental impact, comfortable, responsible manufacturing

Biodegradable

### Amour Vert

Clothing

Slow fashion, sustainable practices, work environment, recyclable, environmental impact, social impact

Compostable

### Arielle

Clothing

Simple clothes, trash free, no worker exploitation, social impact, stylish, sustainable, environmental impact

Plastic Free

### Aura7 Activewear

All except Jewelry and Footwear

Women empowerment, environmental impact, ocean environment

Recycled Materials

Tissue Paper, Eco-friendly ink

### Azura Bay

Clothing

Environmental impact, sustainable practices, sustainable fabrics, ethical, comfortable

Compostable

Eco-friendly ink

back beat co.

BAGGU

BLEUSALT  
MALIBU - EST 2017

BROOK THERE

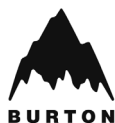ciele  
ATHLETICS

DL1961

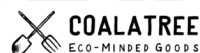Conner  
HANDMADE HATS

COYUCHI

D'Arçé

DÔEN

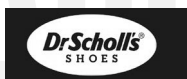éclipse  
freedom in simplicity

EDWIN

EVERLANE

encircled

FOR DAYS

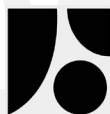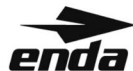

EXPED

📦 boxes 🛍️ bags ✉️ mailers ➡️ other  
🔍 not explicitly defined 🔍 extra data

## Back Beat Co.

- 👤 Clothing
- 🔊 Ethical manufacturing, social impact, ethical, slow fashion, lifestyle
- 📦 Packaging material not defined
- 🔍 Boxes

## Baggu

- 👤👤👤 Accessories
- 🔊 Consumer confidence, make life easier
- ♻️ Recycled Paper Stock
- 🔍 Biodegradable Polybags, Cotton tags

## Bleusalt

- 👤👤👤 Clothing
- 🔊 Quality, environmental impact, comfortable, luxury
- 📦 Recycled Fabric
- 🔍 Recycleable Boxes

## BrookThere

- 👤 Clothing
- 🔊 Environmental impact, sustainable fabrics, responsible manufacturing, comfortable
- 📦 Recycled materials
- 🔍 Recycled tissue paper

## Burton

- 👤👤👤 Misc.
- 🔊 Innovative, social impact, social responsibility
- 🔍 Recycled materials

## Ciele Athletics

- 👤 Clothing
- 🔊 Performance clothing
- 📦 Reusable Materials

## Coalatree

- 👤 All except Jewelry and Footwear
- 🔊 Functional, stylish, environmentally-friendly
- ♻️ Recycled Materials

## Conner Hats

- 👤 Accessories
- 🔊 Environmental impact, environmentally conscious, environmentally-friendly materials
- ♻️ Compostable materials

## Coyuchi

- 👤👤👤 Misc.
- 🔊 Sustainable supply chain, environmental impact, social impact
- 📦 Recycled Materials
- 🔍 Hangtags, Paper inserts

## D'arçé

- 👤 Clothing
- 🔊 Trends, Latin American inspired
- ♻️ Cotton Pouches

## DL1961

- 👤👤👤 Clothing
- 🔊 Vertical supply chain,

environmental impact, family owned  
🔍 Biodegradable Materials

## DÔEN

- 👤 Clothing
- 🔊 Customer relationship, lifestyle, socail impact
- 📦 Post-consumer Materials
- 🔍 Biodegradable Bags

## Dr. Scholl's Shoes

- 👤👤👤 Footwear
- 🔊 Stylish, comfortable, functional, sustainable materials, enviromental impact
- 🔍 Recycled Materials

## Éclipse

- 👤 Clothing
- 🔊 Quality, trends, customer service
- 📦 Cellophane

## Edwin

- 👤 Clothing
- 🔊 Quality, Innovative, responsible manufacturing, denim, heritage
- 📦 Recycled Polyester, Plant based Materials
- 🔍 envelopes

## Encircled

- 👤 Clothing
- 🔊 Style, comfortable, quality, ethical, sustainable products, slow fashion

🔍 Paper Packaging

## Enda

- 👤 All except Jewelry and Footwear
- 🔊 Animal cruelty-free, organic, natural fibers, plant-based dyes, upcycled materials, lifestyle
- 📦 Recycled Fabric

## Everlane

- 👤 All except Jewelry
- 🔊 Ethical factories, quality, responsibly sourced
- 📦 Plastic Poly Bags

## Exped

- 👤 Misc.
- 🔊 Environmental impact, durability, reliable, repairable, supplier relationship, economic impact
- 🔍 Cardboard
- 🔍 Zipper Pouches

## For Days

- 👤 Clothing
- 🔊 Sustainable materials, quality, recyclable, waste reduction, reusable packaging, carbon emissions reduction, closed loop manufacturing, fair prices, environmental impact
- 🔍 Recycled Materials

## Frank and Oak

- 👤 All except Jewelry and Footwear

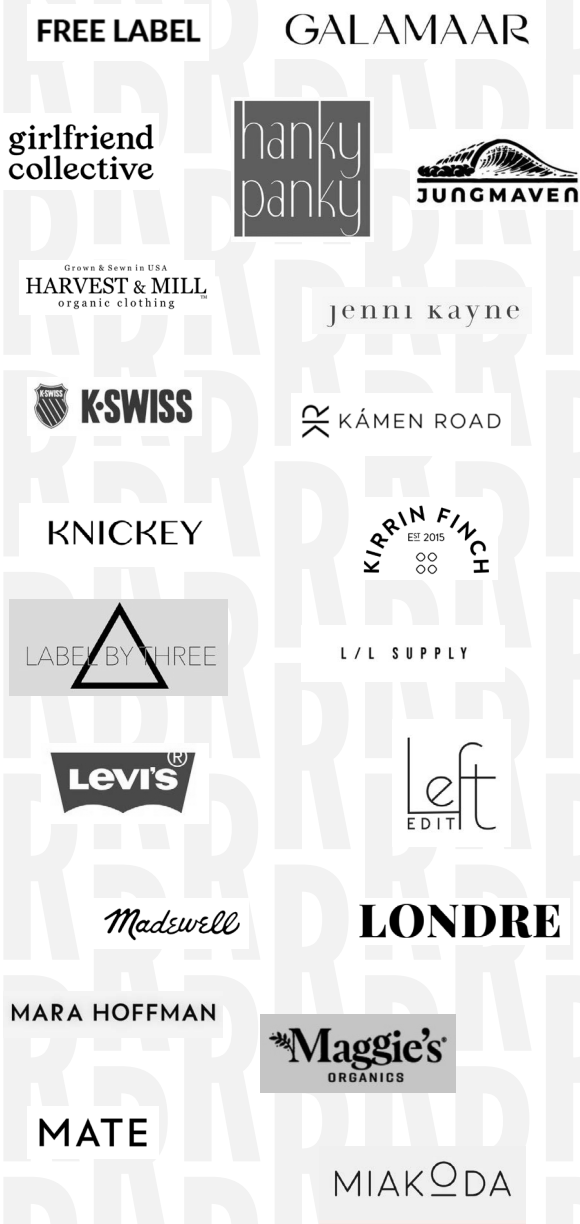

boxes bags mailers other  
 not explicitly defined extra data

Sustainability  
 Post-consumer cardboard, Recycled Materials  
 Mailers

### Free Label

Clothing  
 Fair wages, enviromental impact, minimal production  
 Recycled Materials

### Galamaar

Clothing  
 Slow fashion, functional, and comfortable  
 Recycled Materials

### Girlfriend Collective

Clothing  
 Transparency, slow fashion, conscious consumer  
 Recycled Materials

### Hanky Panky

Underwear and Socks  
 Comfort, quality clothing, US produced, fit focused  
 Recycled Paper

### Harvest & Mill

Clothing  
 Organic cotton, ecological & ethical principles, local  
 Stock Paper

### Jenni Kayne

All

Slow fashion, simplicity, quality  
 Recycled poly bags  
 Boxes

### Jungmaven

All except Jewelry and Footwear  
 Environmental impact, stylish, functional  
 No packaging

### K-Swiss

All except Jewelry  
 Inspire through products  
 FSC approved packaging

### Kamen Road

Accessories  
 Slow fashion, slow travel, natural materials, sustainable alternatives, multipurpose products, environmental impact, Semi-closed manufacturing  
 Recycled Materials

### Knickey

Underwear and Socks  
 Environmental impact, waste reduction, preventing forced labor  
 Recycled Content, Post-consumer waste

### Kirrin Finch

Clothing  
 Fair labor, ethical manufacturing, LGBTQ

empowerment, women empowerment  
 Packaging material not defined

### Label By Three

Clothing  
 Quality, transparency, ethical  
 Recycled Materials

### Left Edit

Clothing  
 Fashion-forward, sustainable, affordable, stylish, durable, quality  
 Post-consumer materials, Kraft Paper  
 Packaging Tape

### Levi Strauss & Co.

Clothing  
 Creativity, heritage, innovative  
 Partial Recycled Plastic

### Lifestyle Over Luxury (LL Supply)

Clothing  
 Quality, sustainability, environmental impact, social impact, circular supply chain  
 Biodegradable Materials

### Londre

All except Jewelry and Footwear  
 Environmental impact, recycled plastic, women's health, environmental conscious

Corn-based, Biodegradable Materials

### Madewell

All except Jewelry  
 Durable, keep-forever, compliment-worthy  
 Recycled Plastic

### Maggie's Organics

All except Jewelry  
 Organic cotton, fair wages, social impact, ethical, sustainable practices  
 Biodegradable  
 Hang Tags

### Mara Hoffman

Clothing  
 Environmental impact, consumer awareness  
 Recycled paper

### Mate the Label

All except Jewelry and Footwear  
 Inclusivity, women empowerment, organic products  
 Recycled paper  
 Tissue paper and hang tags

### Miakoda

All except Jewelry and Footwear  
 Plant-based clothing, ethical, no animal fibers, no synthetic materials, animal cruelty-free

NAADAM

truly wild + new plumage

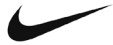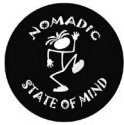

NORDSTROM

NOTHING  
NEW

nuuly

nube

OUTERKNOWN  
Sustainable Style

Outdoor Voices

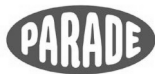

pact

PARKER CLAY

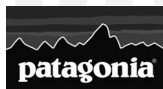

POPLINEN

POPPY BARLEY

PORT ZIENNA

- ➔ Recycled materials, recycled polyethylene
- 🔍 Garment bags, labels, tape, and paper

### Naadam

- 👤 Clothing
- 🔊 Cashmere, quality, fair prices
- ➔ Recycled and biodegradable plastic
- 🔍 paper inserts, hang tags

### Truly Wild + New Plumage

- 👤 All except Jewelry and Footwear
- 🔊 Biodiversity, wildlife conservation, environmental impact
- ➔ Recycled paper, algae ink
- 🔍 Shipping label, hang tag, hemp cord fastener

### NIKE

- 👤 All
- 🔊 Innovative, sustainable practices, social impact, local communities
- 📦 Recycled cardboard, certified cardboard, water-based ink
- 🔍 Tape

### Nomadic State of Mind

- 👤 Footwear
- 🔊 Handmade, slow fashion, durable
- 📦 Not specified
- 🔍 Tags, string

### Nordstrom

- 👤 All
- 🔊 Environmental impact, social impact, resource conservation
- ➔ Recyclable materials

### Nothing New

- 👤 Footwear
- 🔊 Transparency, Virtuous Circle exchange program
- 📦 Recycled paper

### Nube

- 👤 Clothing
- 🔊 Recycled fabrics, environmental impact, recycled plastic, waste reduction
- 📦 Plastic-free, recycled and recyclable materials, biodegradable materials
- 🔍 Order confirmation paper, postcards, hang tags

### Nuuly

- 👤 Clothing
- 🔊 Rental clothing
- ➔ Post-consumer plastic, recycled plastic, recyclable plastic, recyclable cardboard

### Outdoor Voices

- 👤 Clothing
- 🔊 Lifestyle
- ➔ Recycled paper, recyclable cardboard
- 🔍 Paper garment bags

### Outerknown

- 👤 All except Jewelry and Footwear
- 🔊 Organic materials, recycled materials, transparency
- 🔍 Recycled paper
- 🔍 Vela bags

### Pact

- 👤 All except Jewelry and Footwear
- 🔊 Environmental impact, organic cotton, no toxic chemicals, water reduction, safe working conditions, fair trade
- ➔ Post-consumer materials, recycled paper and cardboard
- 🔍 Biodegradable plastic bag

### Parade

- 👤 Underwear and Socks
- 🔊 Recycled materials, no toxic chemicals, environmental impact, compostable
- 📦 Biodegradable and compostable materials
- 🔍 cornstarch garment bags

### Parker Clay

- 👤 Accessories
- 🔊 Byproduct leather, traditional practices, local practices
- 🔍 Recyclable materials

### Patagonia

- 👤 All except Footwear
- 🔊 Ethical, environmental

impact, donations, waste reduction, water reduction, carbon emissions reduction

- ➔ Recycled materials
- 🔍 Paper hangtags, catalogs, paper sushi wraps, rubber bands, plastic t-bar tacks, shoe and wader boxes, polybags, receipt paper, desiccants (silica sachets and packaging stickers), product labels, promotional stickers

### Poplinen

- 👤 Clothing
- 🔊 Environmental impact, recycled materials, compostable materials, plant-based fabrics, low-impact dyes, women empowerment, equality, social impact, sustainable practices, Oeko-Tex Certified, environmentally-friendly
- 📦 Compostable paper, natural materials
- 🔍 Poly bags

### Poppy Barley

- 👤 Misc.
- 🔊 family-owned factories, ethical, donations, fair prices, social impact
- ➔ Recycled paper, recyclable paper, certified paper, compostable materials, corn starch
- 🔍 Reusable dust bag

### Port Zienna

- 👤 Clothing

prAna.

PROCLAIM.

PVH

RAVEN+LILY

Reebok

ROTHY'S

SEEK  
COLLECTIVE

SHAINA MOTE

SOLO  
NEW YORKPRAIRIE  
UNDER  
GROUNDRAMBLERS  
— WAY —

RE/DONE

Reformation

REI  
COOP

saucony

S i i Z U

- Female-owned, artisans, ethical, reduce carbon footprint, steady income, sustainable fabrics, quality, no outsourcing, healthy work environment
- Recycled materials, post-consumer materials
- Tissue paper, garment bags

## prAna

- All except Jewelry and Footwear
- Social impact, sustainability
- Not specified
- Roll pack, raffia ties, certified paper bags, recycled paper hang tags

## Prairie Underground

- Clothing
- Ethical, durable, body positivity
- Second-use boxes

## Proclaim

- Underwear and Socks
- Recycled fabrics, environmental impact, reduce carbon footprint, reduce waste, water reduction, reduce chemicals, environmentally-friendly
- Recycled and recyclable materials
- Wrappers, hang tags

## PVH

- All
- Multiple owned brands,

reusable, innovative, social impact

- Recyclable materials
- Eco-friendly poly bags

## Rambler's Way

- Clothing
- Ethical, local ranchers, local spinners, local dyers
- Recyclable, compostable, biodegradable materials and recycled materials

## Raven+Lily

- Misc.
- Women empowerment, ethical, women-led, social impact, economic improvement
- Recyclable materials, compostable materials, biodegradable materials, zero waste materials

## Re/Done

- Clothing
- Luxury, sustainable fashion
- Recycled materials, reusable materials

## Reebok

- Footwear
- Body positivity, long-term sustainable growth
- Recycled materials

## Reformation

- Clothing
- Environmental impact,

deadstock fabric, repurposed clothing, innovative, sustainable materials

- Compostable materials, recycled LDPE, biodegradable polymer

## REI Co-op

- All except Jewelry
- Quality, great prices
- Certified paper, certified post-consumer materials
- Paper garment bag

## Rothy's

- Footwear
- Sustainable materials
- Vegan and biodegradable cardboard, post-consumer materials, recycled and recyclable materials
- Cards, ribbon

## Saucony

- All except Jewelry
- Plastic free, transparency, Sustainable Apparel Coalition, sustainable practices
- Biodegradable materials

## Seek Collective

- All except Jewelry and Footwear
- Transparency, hand block printing, natural dyes, handloom weaving, hand embroidery, slow fashion, female-owned, artisans, women empowerment, art, minimal production, slow

fashion

- Recycled polyethene, compostable materials, post-consumer materials, recyclable materials
- Renewably sourced, biodegradable and recyclable bubble wrap

## Shaina Mote

- All except Jewelry and Footwear
- Durable products, no toxic chemicals, biodegradable, V Sizing, Better Cotton Initiative, non-toxic dyes
- Post-consumer materials, biodegradable materials, recyclable materials
- Tissue paper, soy-based inks, biodegradable bag, notecards

## Siizu

- All except Footwear
- Natural fabrics, natural materials, polyester-free, sustainable materials, quality, sustainable practices, affordable
- Recyclable paper

## Solo New York

- Accessories
- Recycled plastic bottles, reduce waste
- Certified materials, recycled, recyclable, and biodegradable materials
- Hang tags

- boxes bags mailers other
- not explicitly defined extra data

Sotela  
FOR HUMANS  
BY HUMANS

SUMMERSVLT.

T/A L A

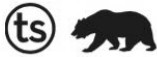

TERRA  
THREAD

Teva

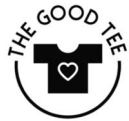

THE VERY  
GOODBRA

TOAD&CO

THOUSAND FELL

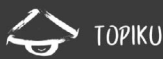

TOMS

tonlé

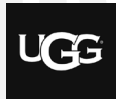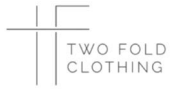

united by blue

u y e s u r a n a  
New York

VEERAH  
NEW YORK

boxes bags mailers other  
 not explicitly defined extra data

## Sotela

- Clothing
- Ethical, body positivity, social impact, environmental impact
- Recycled materials

## Summersalt

- Clothing
- Recycled materials, quality
- Recycled materials
- Poly bags, post cards

## Tala

- Clothing
- Upcycled materials, for people who care, conscious consumption
- Recyclable materials
- Biodegradable seed hang tags, garment bags

## Taylor Stitch

- All
- Durable, environmental impact, water reduction, no chemicals, no pesticides, unique, long-lasting, responsible, sustainable clothing, minimal impact, carbon footprint reduction, recycled fiber, regenerative fiber
- Post-consumer recycled fibers, recyclable materials
- Poly bags, hang tags, labels

## Terra Thread

- Accessories
- Social impact, environmental impact

- Recycled cardboard, recycled paper, plastic-free, certified paper
- Hang tags

## Teva

- Footwear
- Social impact, environmental impact, local communities, corporate responsibility
- Virgin paper, recycled paper, certified paper

## The Good Tee

- Clothing
- Sustainable practices, social impact
- Biodegradable materials, recycled cardboard

## TheVeryGoodBra

- Underwear and Socks
- Functional, unique, waste reduction, toxin free, no post-consumer waste, polyester free, nylon free, synthetic elastic free, spandex free, compostable products
- Compostable polyethylene, recycled polyethylene, recyclable polyethylene
- Tissue paper

## Thousand Fell

- Footwear
- Circularity, waste reduction
- Organic cotton, recyclable cardboard, certified cardboard
- Tape

## Toad & Co.

- All except Footwear
- Organic cotton, organic hemp, tencel, lyocell, lenzing modal, recycled materials, donations, environmental impact, social impact, vegan
- Recycled vinyl, recycled materials, recycled paper, cardboard
- Return label

## TOMS

- Footwear
- Donations, social impact, local economy, economic improvement
- Sustainably managed forest materials, recycled materials

## Tonlé

- Clothing
- Material scraps, handmade, recycled materials
- Hang tags, promotional flyers

## Topiku

- Accessories
- Material scraps, recycled plastic, artisans, upcycled materials, waste resources
- Recyclable materials

## Two Fold Clothing

- Clothing
- Environmental impact, social impact, minimal production,

- slow fashion, quality over quantity, made to order, capsule collections
- Recycled materials

## UGG

- Footwear
- Ethical, responsibly sourced, plant-based materials, carbon-neutral, sheepskin, strict supplier selection, animal welfare
- Recycled materials, certified paper
- Tissue paper

## United By Blue

- All except Footwear
- Responsibly sourced, ethical, sustainable, trash removed from waterways per purchase
- Cardboard
- Tissue paper

## Uye Surana

- Underwear and Socks
- Natural dyes, hand-dyed, sustainable techniques, handmade
- Recycled materials
- Tissue paper

## VEERAH

- Footwear
- Sustainable materials, animal cruelty-free, environmental impact, women empowerment,
- Post-consumer materials, recycled plastic, soy ink

VETTA

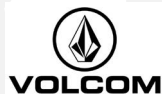

Vitamin A

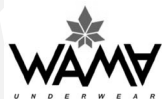

WHIMSY + ROW

WOLVEN

WRAY

ARTEMERA

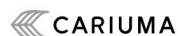

DAUNTLESS

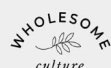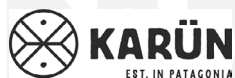

VOZ

n

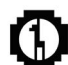

boxes bags mailers other  
not explicitly defined extra data

## Vetta

- 👤 Clothing
- 📢 Women empowerment, social impact, minimal production, responsible manufacturing
- 📦 Recycled materials, certified materials
- 🔍 Poly bags, inserts, packing slips

## Vitamin A

- 👤 Clothing
- 📢 Innovative, plant-based, recycled materials, donations, ocean environment
- 📦 Recycled, recyclable, and biodegradable materials
- 🔍 Flap and seal bags

## Volcom

- 👤 All
- 📢 Creative, passion, community, ambassadors, reshaping the world
- 🔍 Recycled materials, certified materials
- 🔍 Hang tags

## Wama

- 👤 Underwear and Socks
- 📢 Organic hemp, quality, well-made, comfortable
- ➡ Recycled and recyclable polyethylene
- 🔍 Tissue paper, stickers

## Whimsy+Row

- 👤 Clothing
- 📢 Quality, women empowerment, sustainable practices
- ➡ Recycled materials, post-consumer waste, post-consumer content

## Wholesome Culture

- 👤 All
- 📢 Lifestyle, environmental impact, social impact
- 🔍 Recycled materials, biodegradable materials

## Wolven

- 👤 Clothing
- 📢 Innovative, social impact, art, body positivity, creativity, diversity
- ➡ Recycled polyethylene, biodegradable paper
- 🔍 Hemp twine

## Wray

- 👤 Clothing
- 📢 Fine-arts influenced, hand-painted prints, unique colors, playfulness
- 🔍 Not specified
- 🔍 Slider bag, tags, packing slip

## SOUTH AMERICA

### Artemera

- 👤 All except Jewelry
- 📢 Environmental impact, social impact, nationalism, doing good, talent, unique, intelligence, intuition, sustainable growth, passion
- 🔍 Packaging material not defined

### Cariuma

- 👤 Footwear
- 📢 Quality, handmade, natural materials, responsible manufacturing, comfortable
- 📦 Recycled materials
- 🔍 Biodegradable Shoe fillers

### Dauntless

- 👤 All except Jewelry
- 📢 Socially conscious, responsibly sourced, GOTS, IVONS, PETA Certified Vegan, SGS, fair trade, waste reduction, quality, vegan, conscious consumption, transparency
- 📦 Recycled Materials
- 🔍 Hang-tags

### Karün

- 👤 Accessories
- 📢 Circular, Quality
- ➡ Recycled paper, cardboard and leather, organic cotton bags, corn-based fillers

## NIDO

- 👤 Clothing
- 📢 Quality, craftsmanship, sheep wool, hand-spun, hand-dyed, hand knitted, handmade, minimal production, sustainable practices, local traditional techniques, artisan garments, unique garments
- 🔍 Not specified

## PAKA

- 👤 All except Jewelry and Footwear
- 📢 Social impact
- 📦 Biodegradable and compostable materials

## VOZ

- 👤 All
- 📢 Ethical, rural indigenous women, artisans, women empowerment, traditional art forms, living wages, sustainable fibers
- 🔍 Not specified

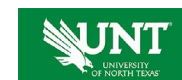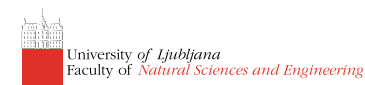

#### Authors

Iva Jestratijević  
University of North Texas

Urška Vrabič Brodnjak  
University of Ljubljana,  
Faculty of Natural Sciences and Engineering,  
Chair of Information and Graphic Arts Technology

#### Data collection

UNT graduate students  
Department of Merchandising, CMHT

Meagan Eaply, Mikah Oliver,  
Grace Gunnin, Lauren McCullar

#### Data processing and visual design

Veronika Štampfl  
University of Ljubljana,  
Faculty of Natural Sciences and Engineering,  
Chair of Information and Graphic Arts Technology

#### Published

October 2022
